# Supplementary material for: Molecular basis of human nuclear and mitochondrial tRNA 3′ processing
Source: Springer Nature journal article supplement (doi:10.1038/s41594-024-01445-w), 2025-01-02

Figure 1d

Region shown in Figure 1d is indicated by dashed box

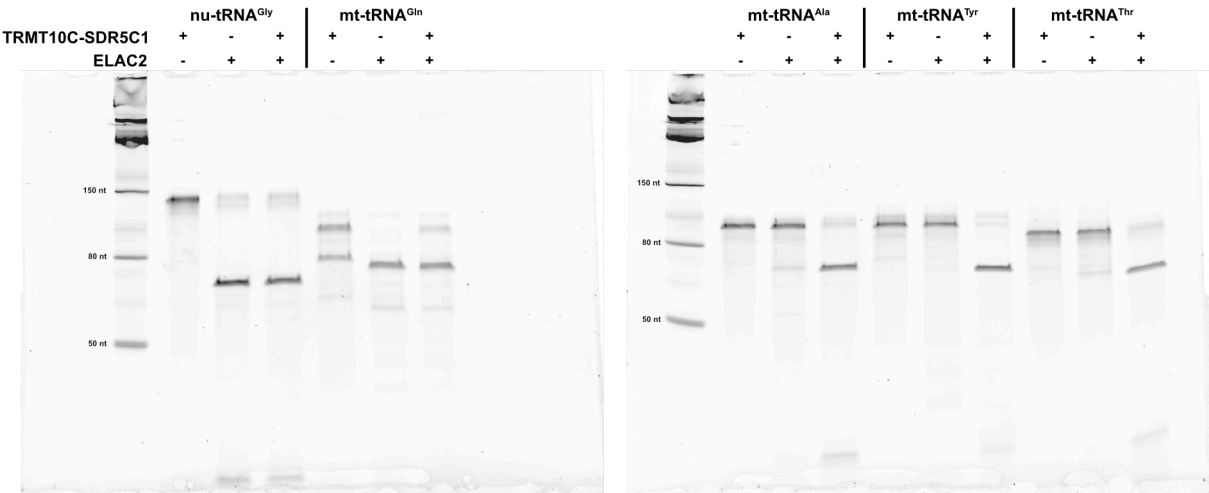

Replicate 1

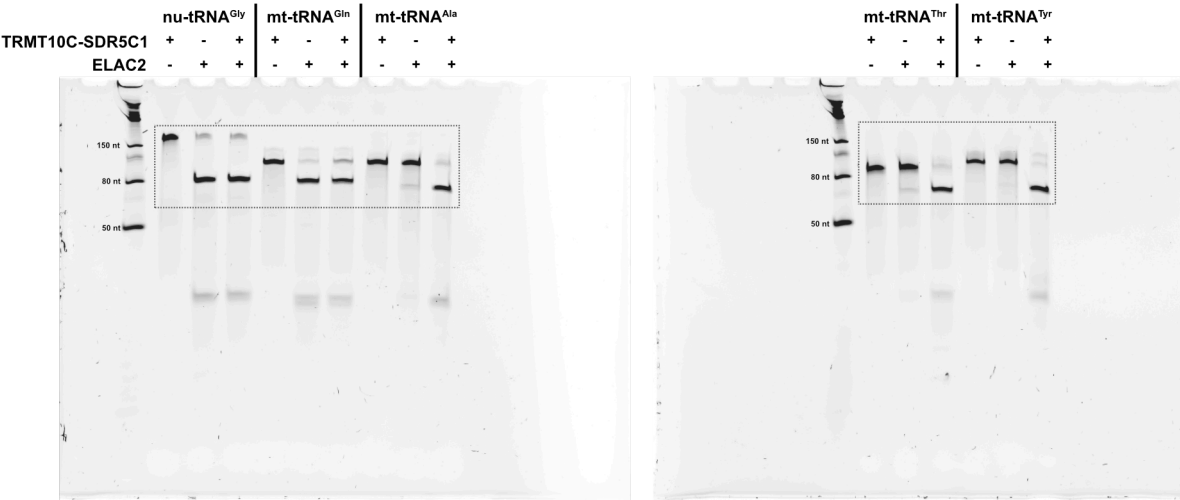

Replicate 2

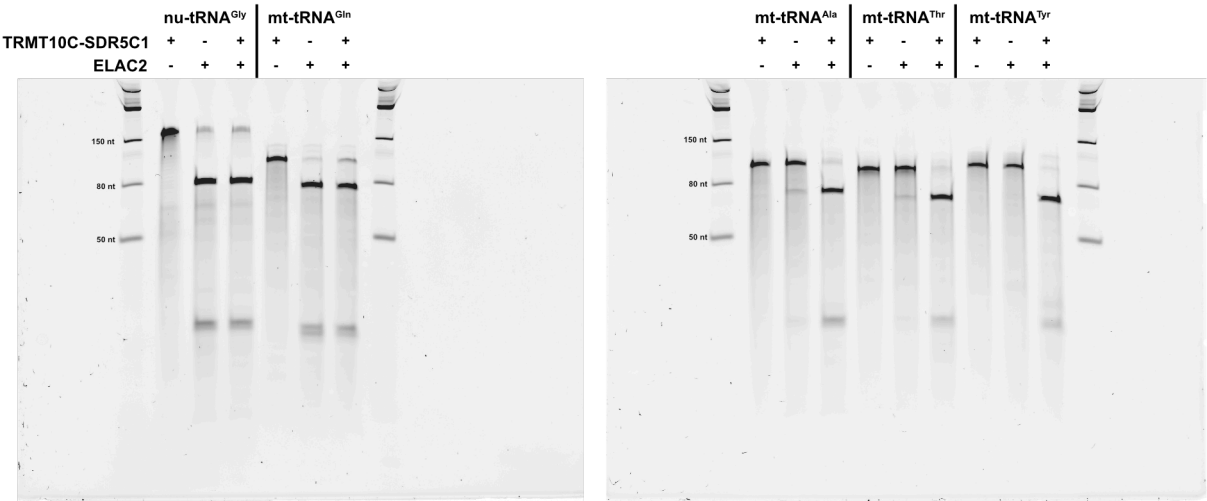

Replicate 3

Figure 1e

Region shown in Figure 1e is indicated by dashed box

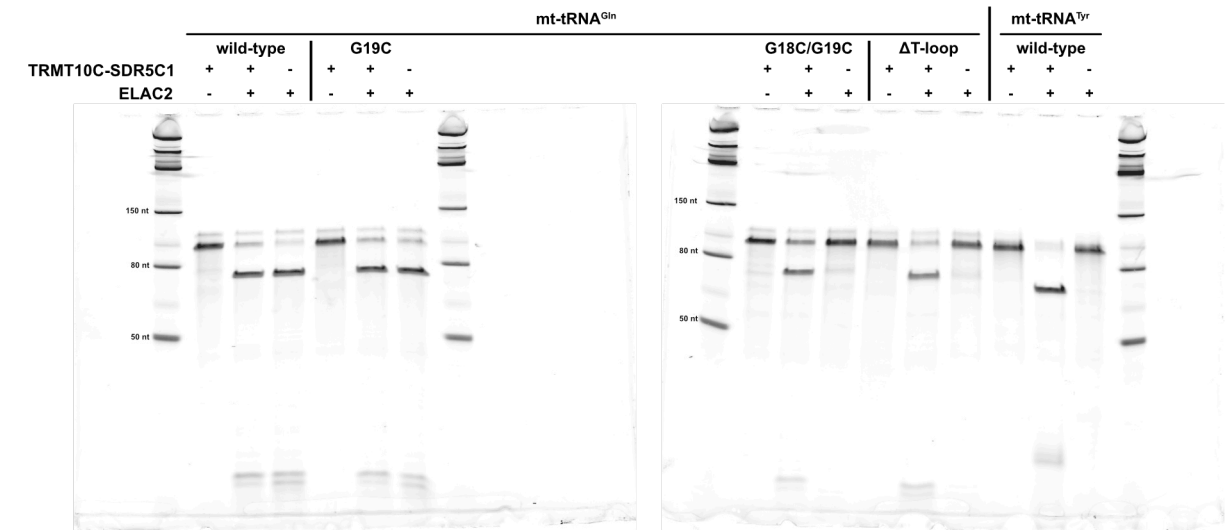

Replicate 1

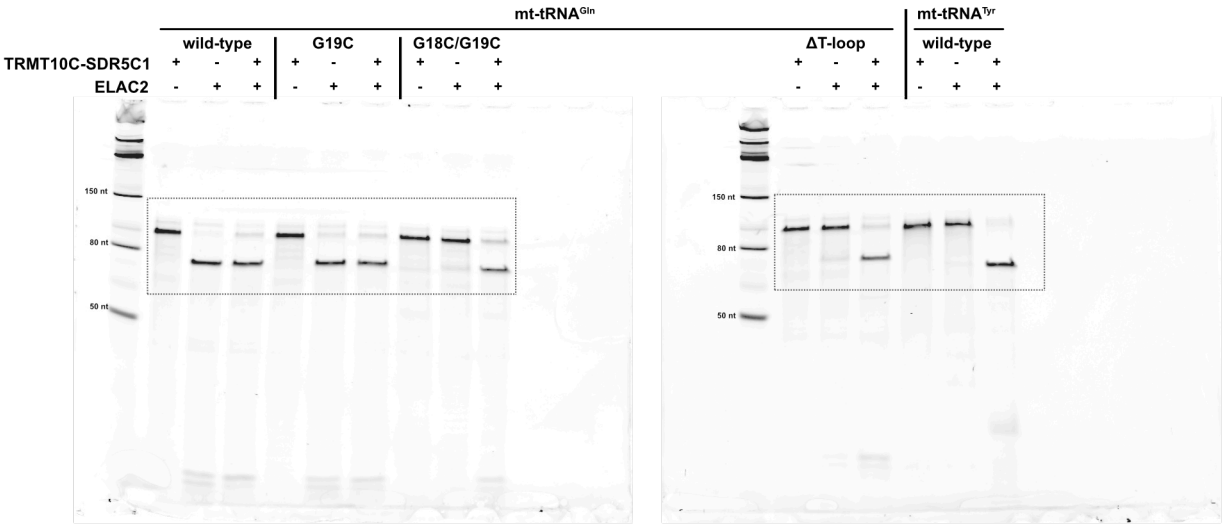

Replicate 2

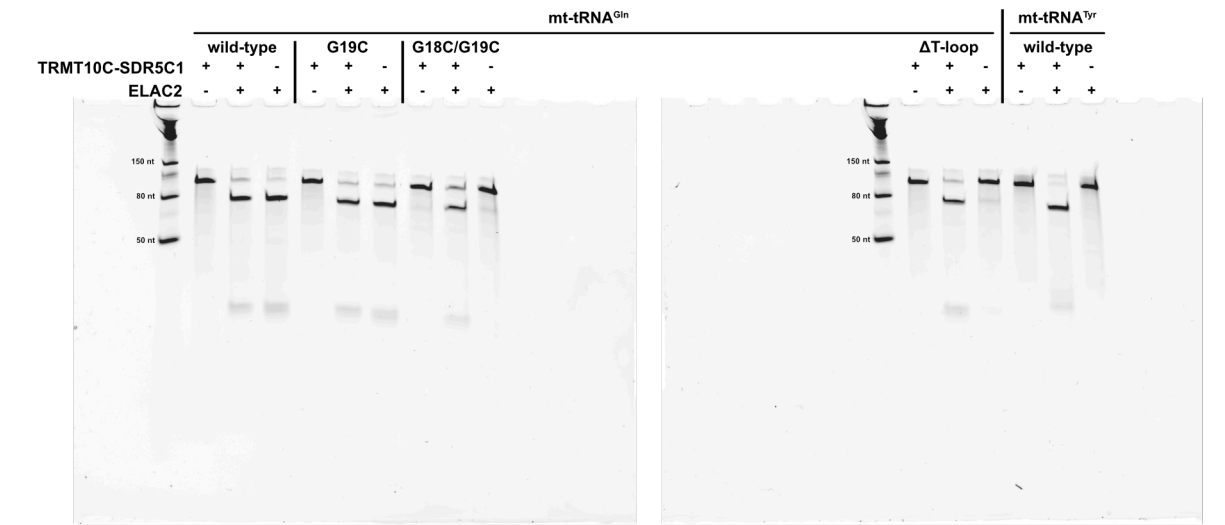

Replicate 3

**Figure 3g and 5g**  
Regions shown in Figures 3g and 5g are indicated by dashed boxes

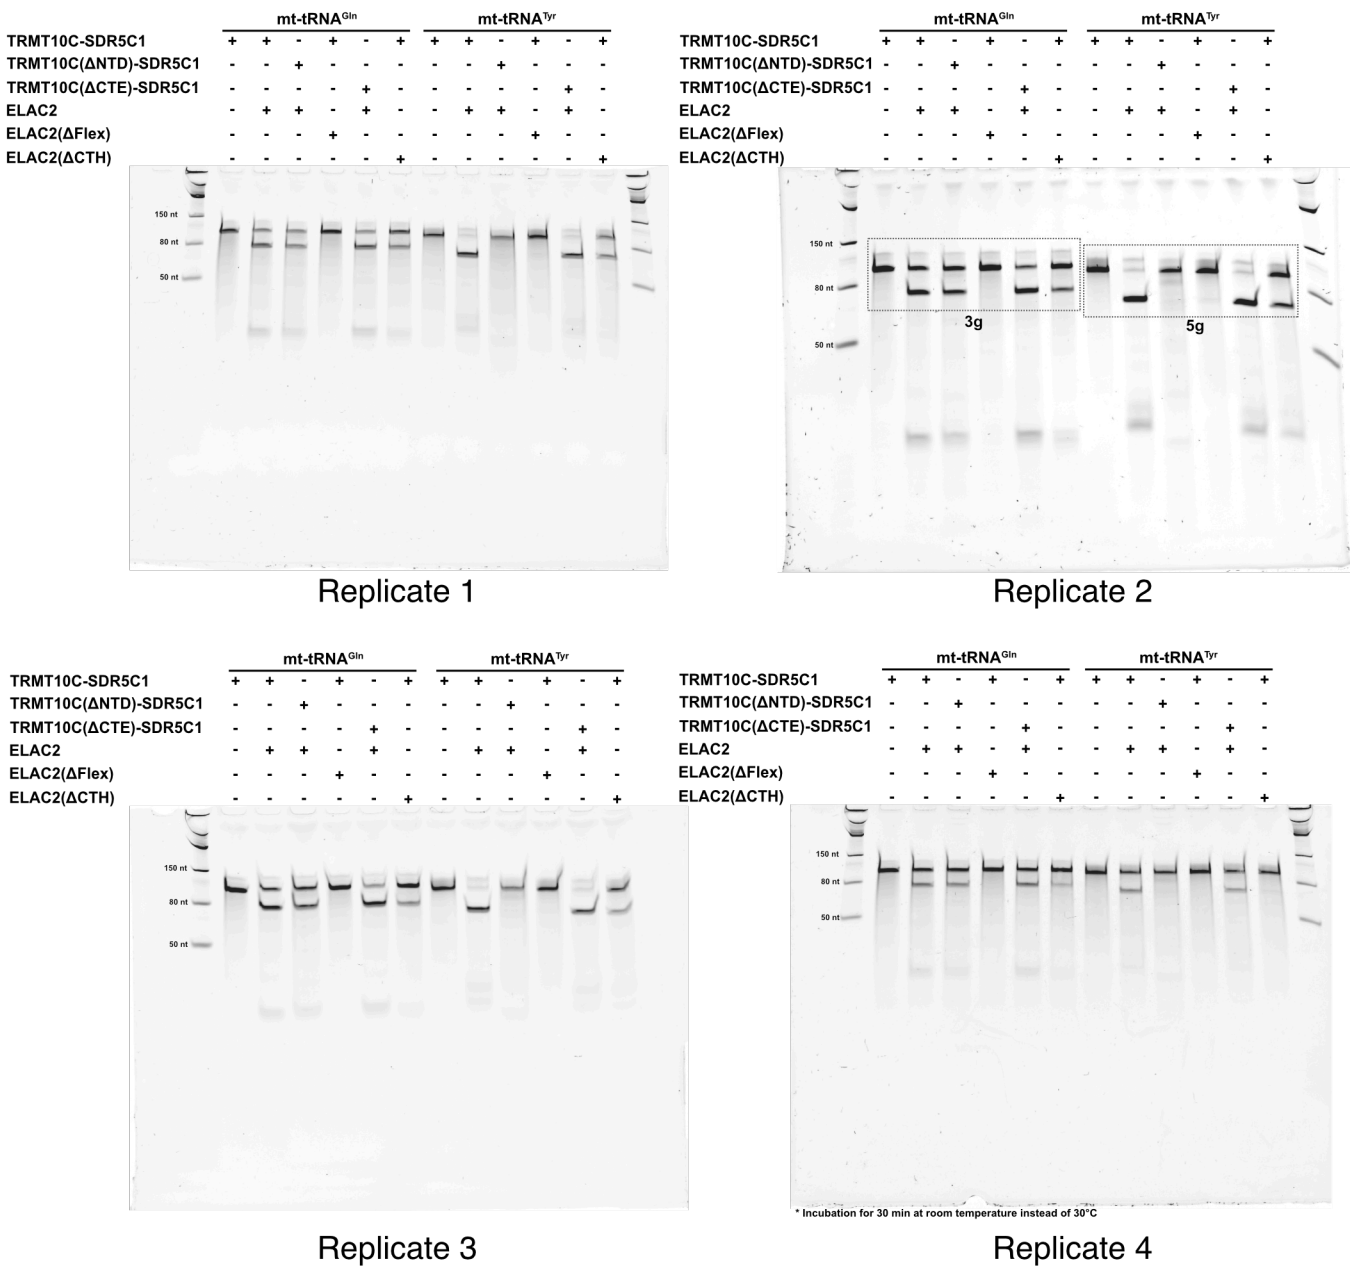

**Figure 4c**  
Region shown in Figure 4c is indicated by dashed boxes

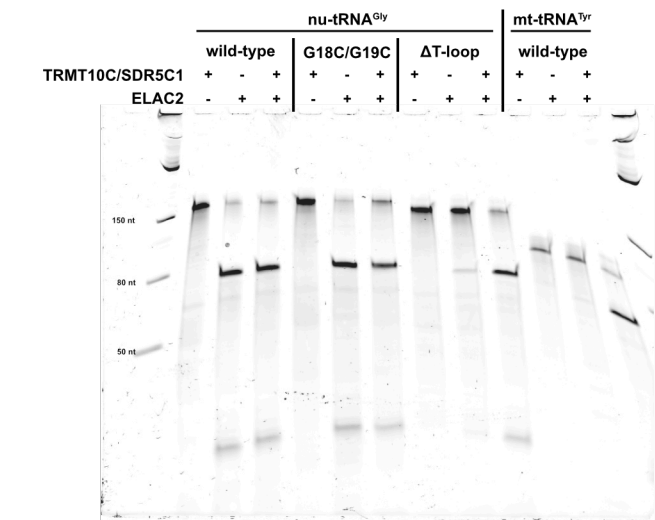

Replicate 1

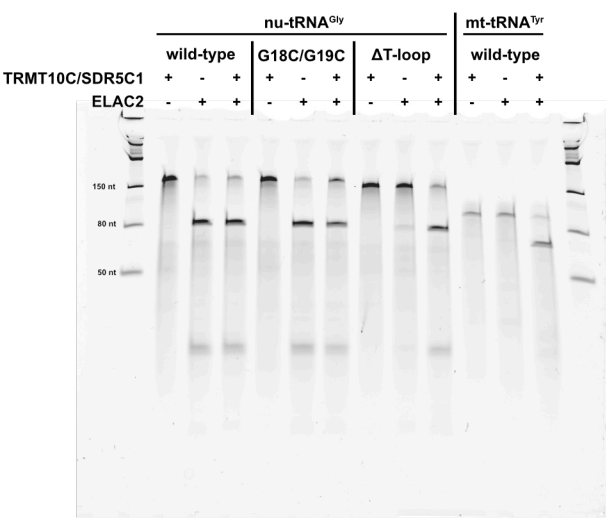

Replicate 2

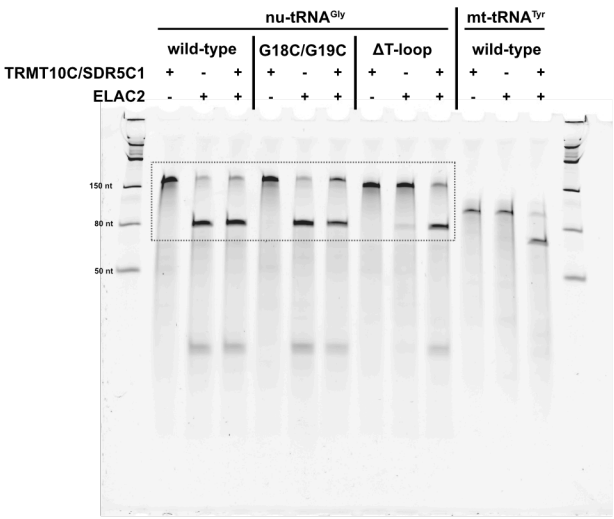

Replicate 3

**Extended Data Figure 1b**  
 Region shown in ED-Figure 1b is indicated by dashed box

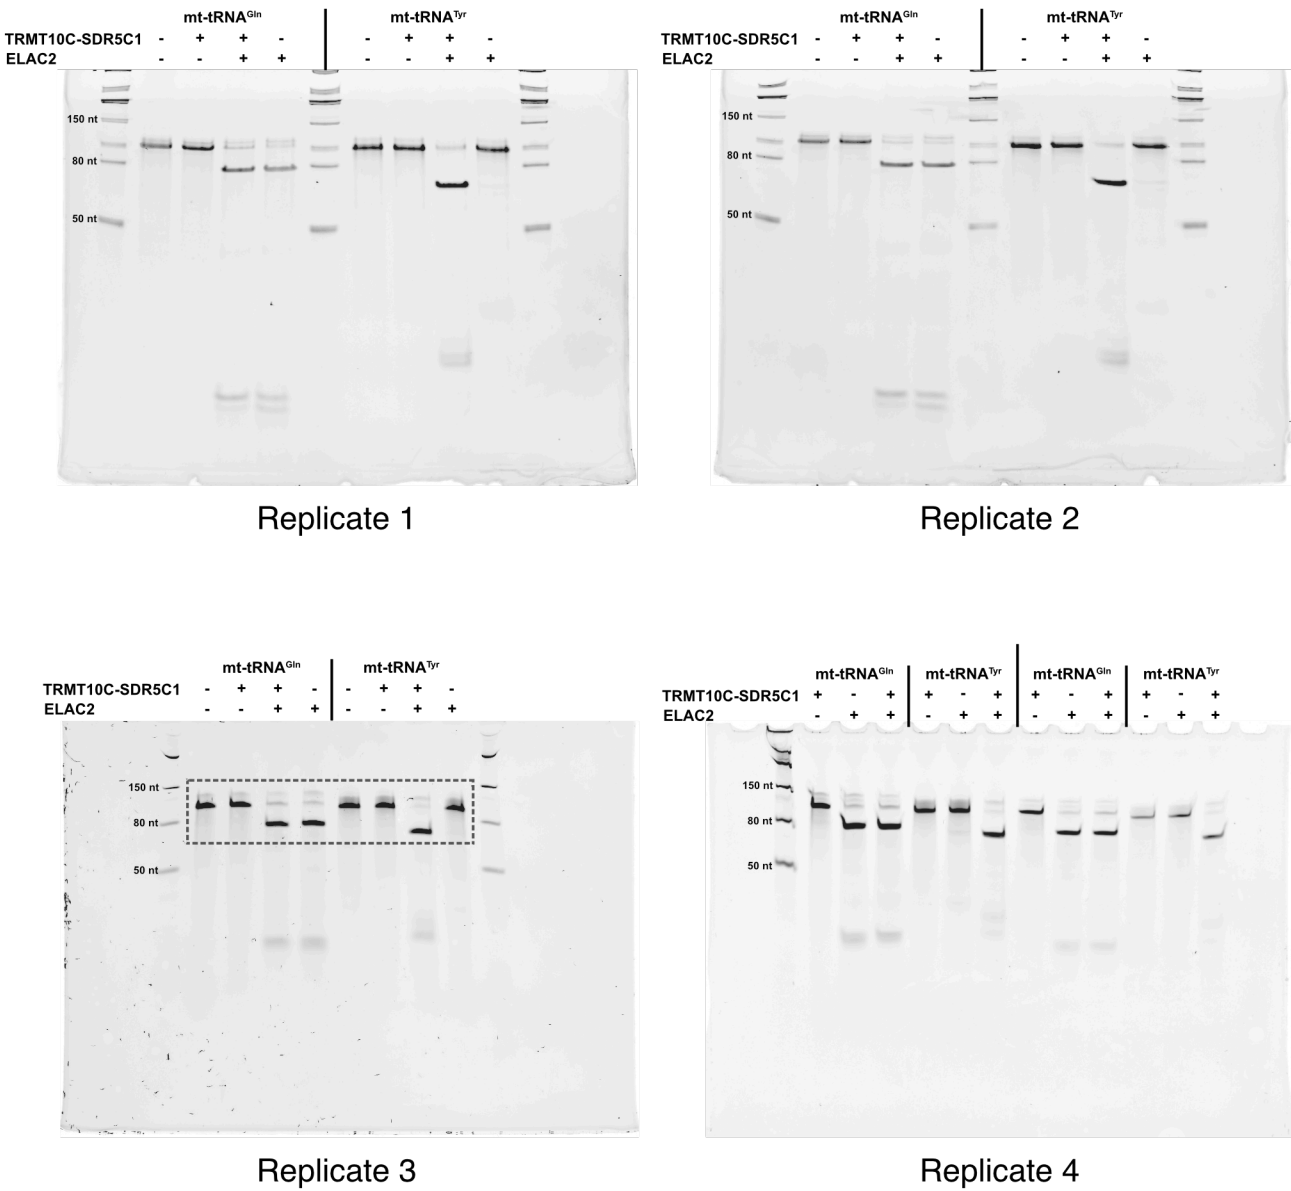

**Extended Data Figure 1d**  
 Regions shown in ED-Figure 1d is indicated by dashed box

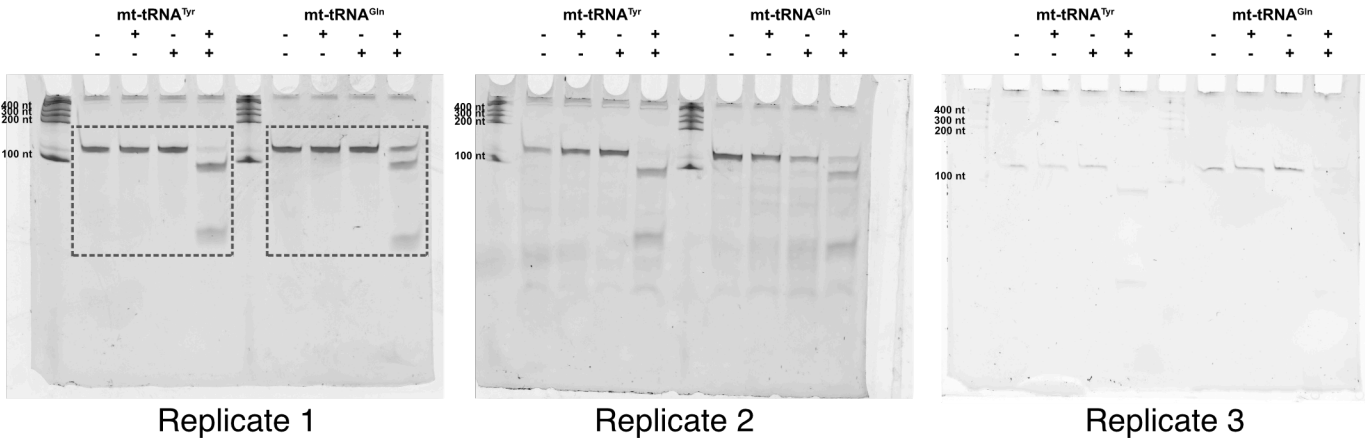

Extended Data Figure 2a

Region shown in ED-Figure 2a is indicated by dashed box

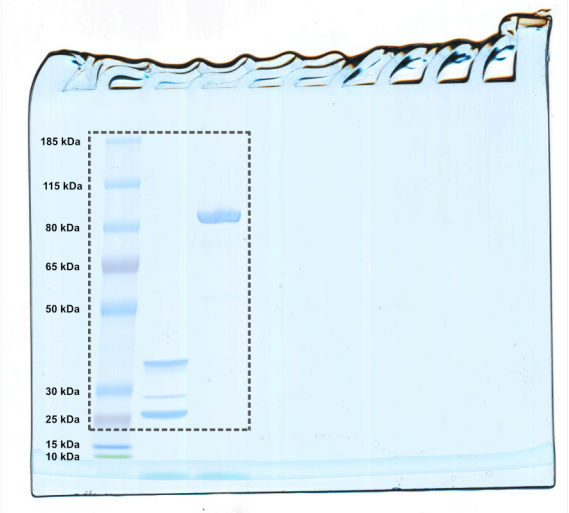

Extended Data Figure 2b

Regions shown in ED-Figure 2b are indicated by dashed boxes

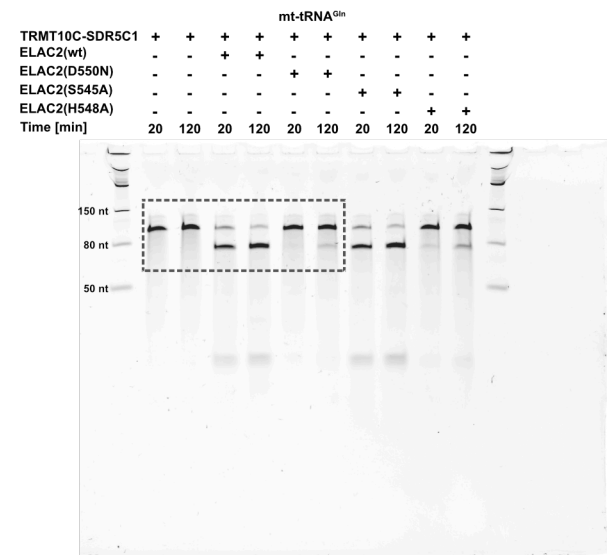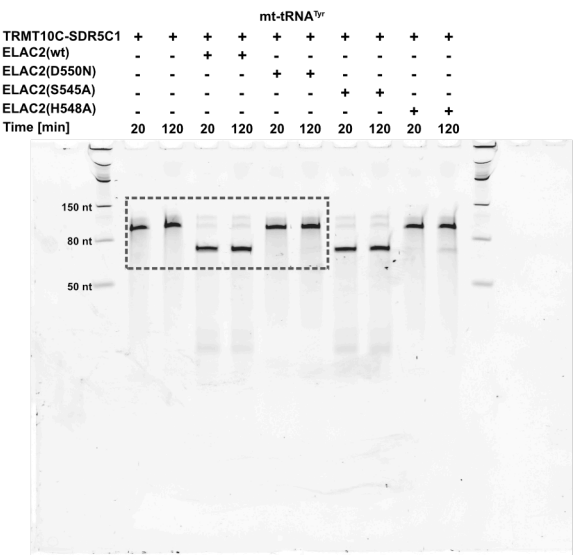

Extended Data Figure 2c

Region shown in ED-Figure 2c is indicated by dashed boxes

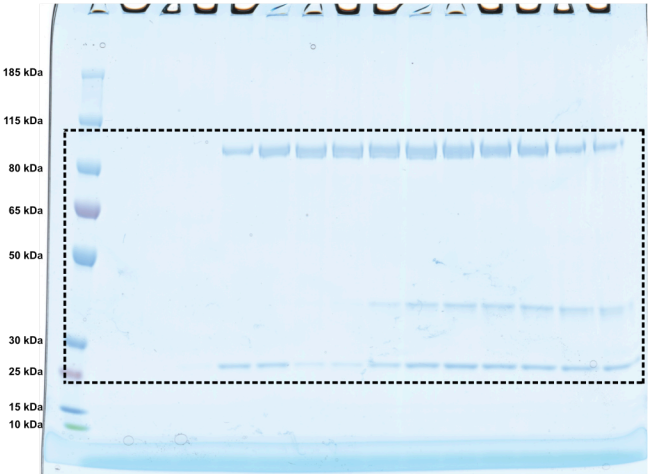

Extended Data Figure 2d

Region shown in ED-Figure 2d is indicated by dashed boxes

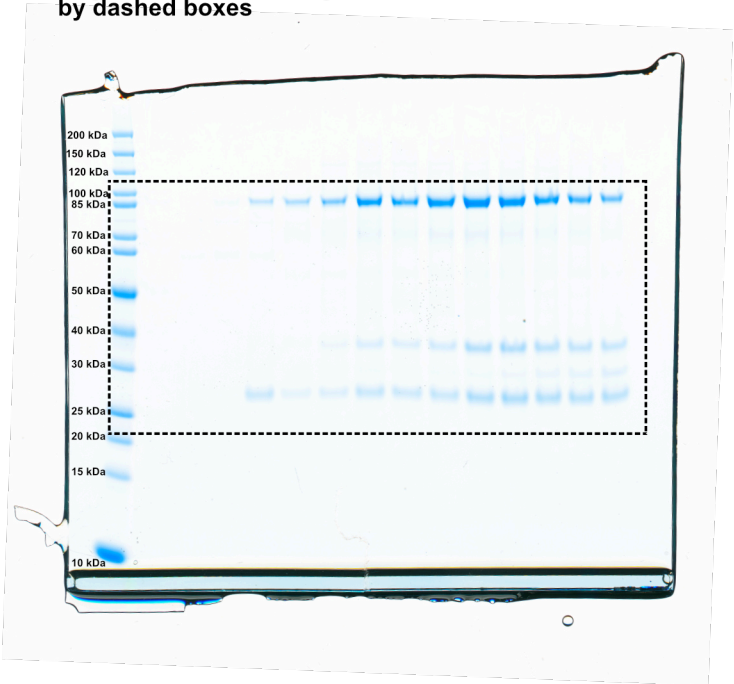

Extended Data Figure 7f

Regions shown in ED-Figure 7f are indicated by dashed boxes

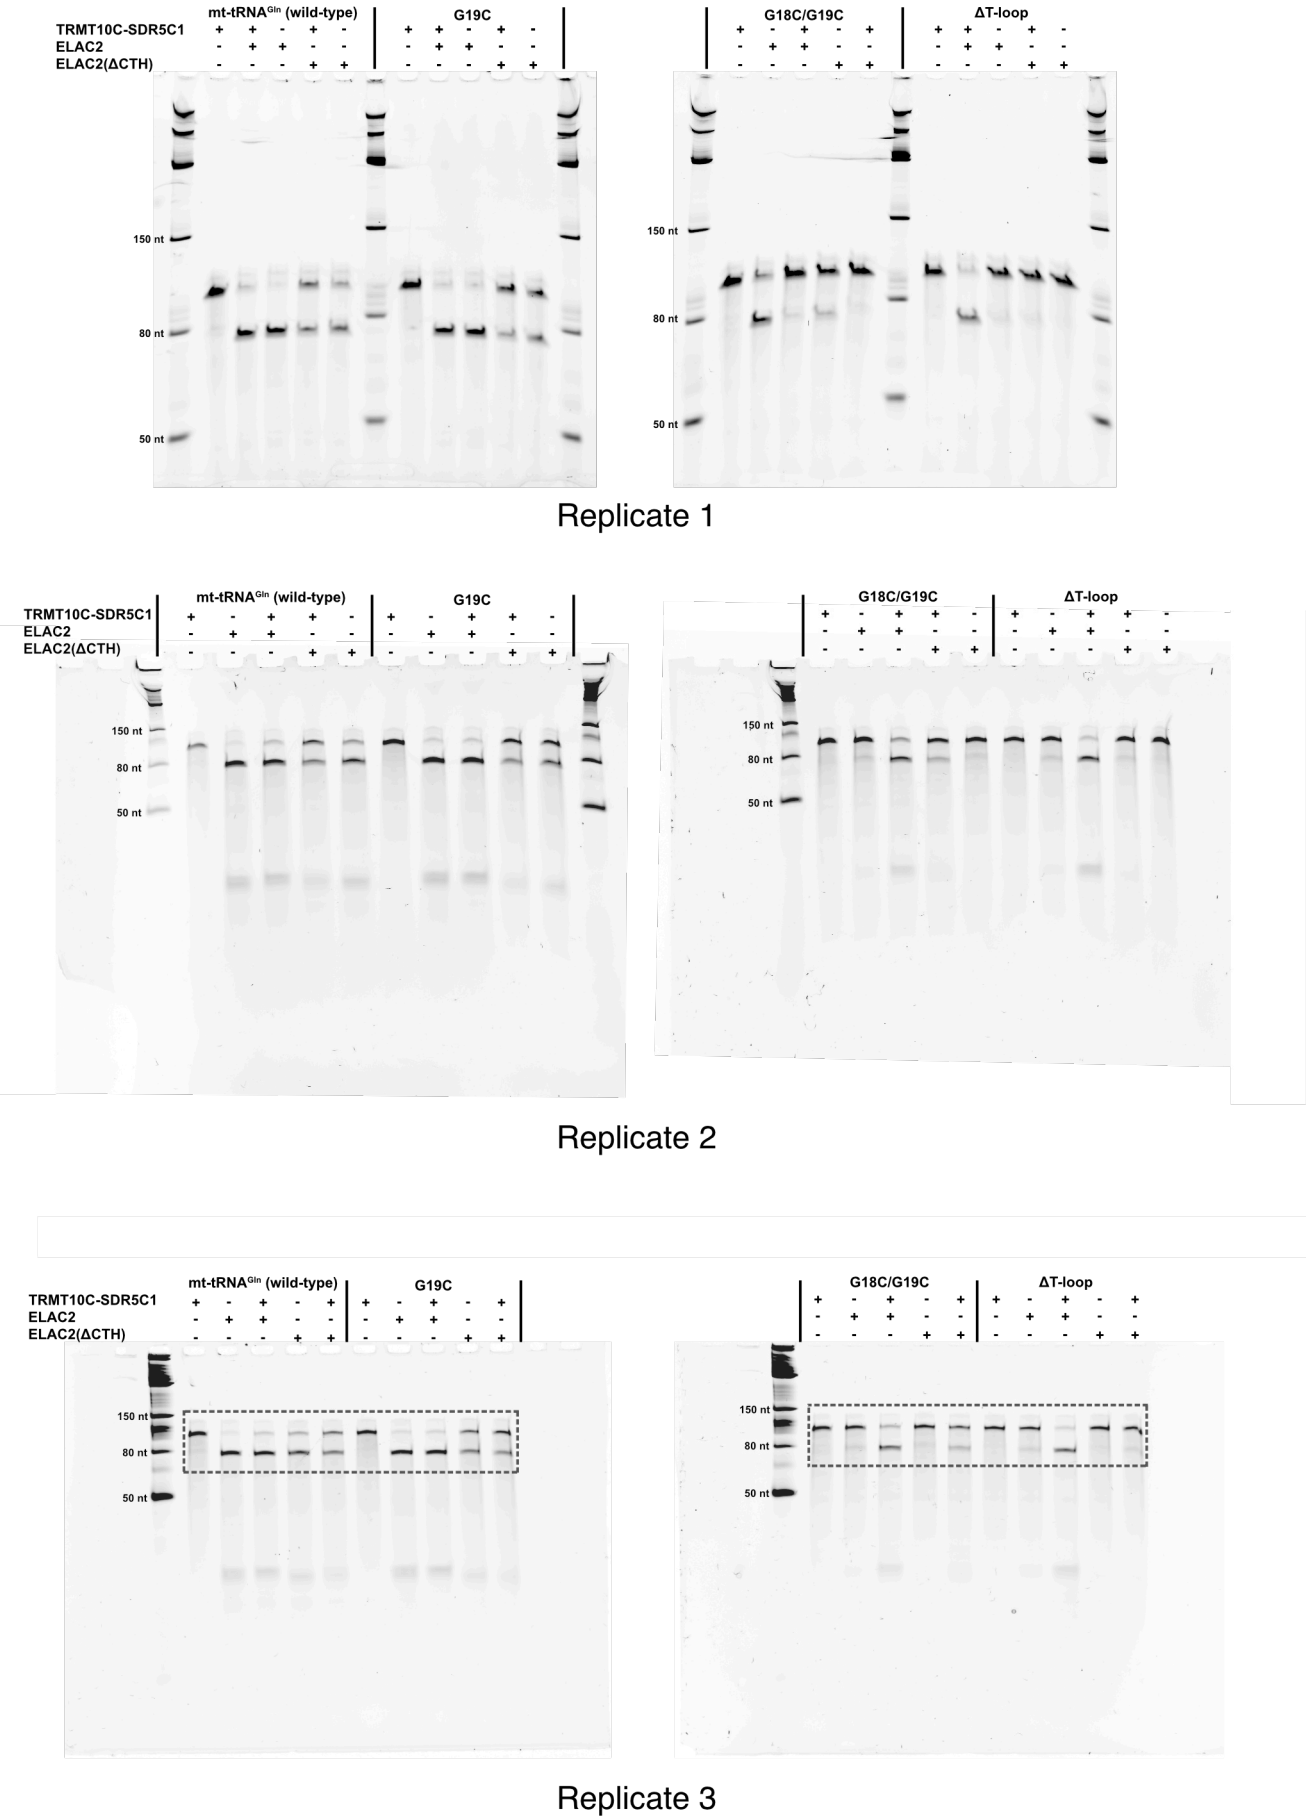

Extended Data Figure 9e

Region shown in ED-Figure 9e is indicated by dashed box

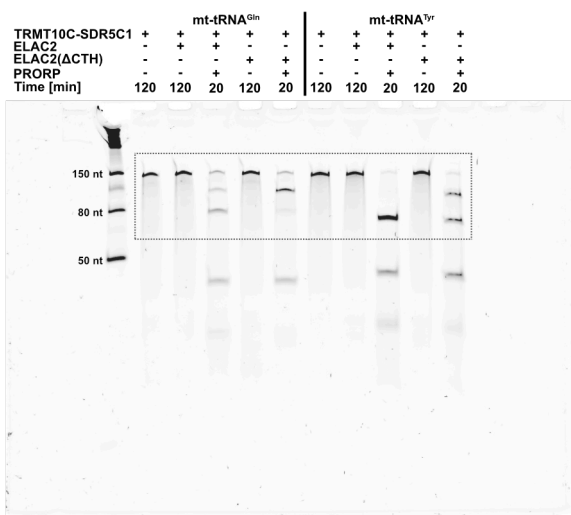

Supplement: MOESM4 [file 41594_2024_1445_MOESM4_ESM.pdf › 41594_2024_1445_MOESM4_ESM.pdf]
