# Supplementary material for: Molecular basis of human nuclear and mitochondrial tRNA 3′ processing
Source: Nat Struct Mol Biol. 2025 Jan 2;32(4):613–24. doi: 10.1038/s41594-024-01445-w (PMC11996679; doi:10.1038/s41594-024-01445-w)
Supplement: Supplementary file 3 — DNA oligos and RNAs used in this study. [file 41594_2024_1445_MOESM3_ESM.xlsx]

## Sheet: DNA oligos
	Construct	Direction	Sequence
Cloning
	TRMT10C(Δ1-91)/SDR5C1	Forward	GCTGCCACCAGAGAGTTCATTGAG
		Reverse	TGCATTGGATTGGAAGTACAGGTTTTC
	TRMT10C(Δ1-124)/SDR5C1	Forward	CCAATGCATCTAACACAGCAAAAAAAAAATATTTAAAATATTTATATACGAAGGAAAAAG
		Reverse	TGTTAGATGCATTGGATTGGAAGTACAGGTTTTCATGGTGATG
	TRMT10C(Δ385-403)/SDR5C1	Forward	GGTTTTTAATAACATTGGAAGTGGATAACTGGCTGCTG
		Reverse	ATGTTATTAAAAACCAGTATGTTTTCTCTTGGGAACGAATTGC
	ELAC2(Δ1-31)	Forward	TTTAAGAAGGAGATATAGATCATGCCGCGCAAGGACCCGCTG
		Reverse	TTATGGAGTTGGGATCTTATTACTGGGCTCTGACCTTCTTGGCCTGTGG
	ELAC2(Δ772-826)	Forward	TAATAACATTGGAAGTGGATAACGG
		Reverse	AAACAGGGCTTTCAGTGGG
	ELAC2(Δ250-298)	Forward	CCTCCAGATCCTGGTGCTG
		Reverse	TAAGTGAAGCTTACAGATGAAAGC
RNA IVT template oligos
	5–tRNAGln–24	Forward	AATTCTAATACGACTCACTATAGGTACTAGGATGGGGTGTGATAGGTGGCACGGAGAATTTTG
		Reverse	CTAGGACTATGAGAATCGAACCCATCCCTGAGAATCCAAAATTCTCCGTGC
RNA template amplification primers
	38–tRNATyr–24	Forward	GGATCCTAATACGACTCACTATAG
		Reverse	TCAATATGAAAATCACCTCGGAGCTGG
	38–tRNAGln–24	Forward	GGATCCTAATACGACTCACTATAG
		Reverse	ATAGGAGCTTAAACCCCCTTATTTCTAGG
	0–tRNATyr–24	Forward	GGATCCTAATACGACTCACTATAG
		Reverse	TCAATATGAAAATCACCTCGGAGCTGG
	5–tRNAGln–24	Forward
		Reverse
	0–tRNAGln–24	Forward	GGATCCTAATACGACTCACTATATAG
		Reverse	ATAGGAGCTTAAACCCCCTTATTTCTAGG
	0–tRNAGln–24 (Tloop-Tyr)	Forward	GGATCCTAATACGACTCACTATATAG
		Reverse	ATAGGAGCTTAAACCCCCTTATTTCTAGG
	0–tRNAThr–24	Forward	GGATCCTAATACGACTCACTATAG
		Reverse	GAGTTAAAGACTTTTTCTCTGATTTGTCCTTG
	0–tRNAAla–24	Forward	GGATCCTAATACGACTCACTATAAAG
		Reverse	GCAATACTTAATTTCTGTAACAGCTAAGGAC
	0–nu-tRNAGly–24	Forward	GGATCCTAATACGACTCACTATAGGC
		Reverse	TTTAGCGAGCGAGAAGCAAAACGC

## Sheet: RNAs
RNA		Sequence
38–tRNATyr–24	WT	GAGAAUAGUCAACGGUCGGCGAACAUCAGUGGGGGUGAGGUAAAAUGGCUGAGUGAAGCAUUGGACUGUAAAUCUAAAGACAGGGGUUAGGCCUCUUUUUACCAGCUCCGAGGUGAUUUUCAUAUUGA
38–tRNAGln–24	WT	GGGUAUGGGCCCGAUAGCUUAUUUAGCUGACCUUACUUUAGGAUGGGGUGUGAUAGGUGGCACGGAGAAUUUUGGAUUCUCAGGGAUGGGUUCGAUUCUCAUAGUCCUAGAAAUAAGGGGGUUUAAGCUCCUAU
0–tRNATyr–24	WT	GGUAAAAUGGCUGAGUGAAGCAUUGGACUGUAAAUCUAAAGACAGGGGUUAGGCCUCUUUUUACCAGCUCCGAGGUGAUUUUCAUAUUGA
5–tRNAGln–24	Trailer (Tyr)	GGUGAUAGGAUGGGGUGUGAUAGGUGGCACGGAGAAUUUUGGAUUCUCAGGGAUGGGUUCGAUUCUCAUAGUCCUAGGCUCCGAGGUGAUUUUCAAGCUCG
0–tRNAGln–24	WT	UAGGAUGGGGUGUGAUAGGUGGCACGGAGAAUUUUGGAUUCUCAGGGAUGGGUUCGAUUCUCAUAGUCCUAGAAAUAAGGGGGUUUAAGCUCCUAU
0–tRNAGln–24	G19C	UAGGAUGGGGUGUGAUAGCUGGCACGGAGAAUUUUGGAUUCUCAGGGAUGGGUUCGAUUCUCAUAGUCCUAGAAAUAAGGGGGUUUAAGCUCCUAU
0–tRNAGln–24	G18C/G19C	UAGGAUGGGGUGUGAUACCUGGCACGGAGAAUUUUGGAUUCUCAGGGAUGGGUUCGAUUCUCAUAGUCCUAGAAAUAAGGGGGUUUAAGCUCCUAU
0–tRNAGln–24	Tloop(Tyr)	UAGGAUGGGGUGUGAUAGGUGGCACGGAGAAUUUUGGAUUCUCAGGGAUGGGUUAGGCUCAUAGUCCUAGAAAUAAGGGGGUUUAAGCUCCUAU
0–tRNAGln–24	Trailer (Tyr)	UAGGAUGGGGUGUGAUAGGUGGCACGGAGAAUUUUGGAUUCUCAGGGAUGGGUUCGAUUCUCAUAGUCCUAGGCUCCGAGGUGAUUUUCAUAUUGA
0–tRNAThr–24	WT	GUCCUUGUAGUAUAAACUAAUACACCAGUCUUGUAAACCGGAGAUGAAAACCUUUUUCCAAGGACAAAUCAGAGAAAAAGUCUUUAACUC
0–tRNAAla–24	WT	AAGGGCUUAGCUUAAUUAAAGUGGCUGAUUUGCGUUCAGUUGAUGCAGAGUGGGGUUUUGCAGUCCUUAGCUGUUACAGAAAUUAAGUAUUGC
0–nu-tRNAGly–24	WT	GCGCCGCUGGUGUAGUGGUAUCAUGCAAGAUUCCCAUUCUUGCGACCCGGGUUCGAUUCCCGGGCGGCGCAUAGGCGUUUUGCUUCUCGCUCGCUAAA
0–nu-tRNAGly–24	G18C/G19C	GCGCCGCUGGUGUAGUCCUAUCAUGCAAGAUUCCCAUUCUUGCGACCCGGGUUCGAUUCCCGGGCGGCGCAUAGGCGUUUUGCUUCUCGCUCGCUAAA
0–nu-tRNAGly–24	Tloop(Tyr)	GCGCCGCUGGUGUAGUGGUAUCAUGCAAGAUUCCCAUUCUUGCGACCCGGGUUAGGCCCGGGCGGCGCAUAGGCGUUUUGCUUCUCGCUCGCUAAA
	RNAs used for structure determination are highlighted in blue.
